# Supplementary material
Source: publisher figshare collection journal article supplement (https://rs.figshare.com/ndownloader/files/13772471)
Supplement: Supplementary file 1 [file 13772471]

name	stimulus_set	trial	preference	bias
cadence	a	ratio decoy of 1	0.2188976377952756	FALSE
caitlin	a	ratio decoy of 1	0.7796284433055733	FALSE
cali	a	ratio decoy of 1	0.4156441717791411	FALSE
callie	b	ratio decoy of 1	0.916595744680851	TRUE
camila	a	ratio decoy of 1	1	FALSE
camille	a	ratio decoy of 1	0.30991735537190085	FALSE
camryn	b	ratio decoy of 1	0.9491242702251876	FALSE
candice	b	ratio decoy of 1	0.4551056338028169	FALSE
candy	a	ratio decoy of 1	0.34844668345927793	FALSE
cara	a	ratio decoy of 1	0.7872340425531915	FALSE
carina	a	ratio decoy of 1	0.45535714285714285	FALSE
carissa	b	ratio decoy of 1	0.5794223826714802	FALSE
carla	a	ratio decoy of 1	0.7984496124031008	FALSE
carlene	a	ratio decoy of 1	0.7416	FALSE
carmen	b	ratio decoy of 1	0.5732801595214357	FALSE
caroline	a	ratio decoy of 1	1	FALSE
carolyn	a	ratio decoy of 1	0.8390688259109311	FALSE
carrie	a	ratio decoy of 1	1	FALSE
casandra	b	ratio decoy of 1	0.27895752895752896	FALSE
catherine	b	ratio decoy of 1	0.6115627822944896	FALSE
cathleen	b	ratio decoy of 1	0.9074195666447801	FALSE
cathy	a	ratio decoy of 1	0.7023608768971332	FALSE
cecelia	b	ratio decoy of 1	0.5705832628909552	FALSE
cecile	a	ratio decoy of 1	0.9527656929770043	FALSE
charity	b	ratio decoy of 1	0.2314410480349345	FALSE
charlie	a	ratio decoy of 1	0	FALSE
chasity	a	ratio decoy of 1	0.575107296137339	FALSE
christa	b	ratio decoy of 1	0.6720202874049028	FALSE
chrystal	a	ratio decoy of 1	0.9642228739002933	FALSE
claire	b	ratio decoy of 1	0.23094512195121952	FALSE
clarice	b	ratio decoy of 1	0.25060240963855424	FALSE
clarissa	a	ratio decoy of 1	0.45261984392419174	FALSE
claudette	b	ratio decoy of 1	0.42594075260208164	FALSE
cleo	b	ratio decoy of 1	0.05065359477124183	FALSE
corina	a	ratio decoy of 1	1	FALSE
corine	a	ratio decoy of 1	0.4153153153153153	FALSE
corinne	a	ratio decoy of 1	0.3404255319148936	FALSE
cornelia	a	ratio decoy of 1	1	FALSE
cristol	b	ratio decoy of 1	0.7288602941176471	FALSE
cynthia	a	ratio decoy of 1	0	FALSE
cadence	a	ratio decoy of 3	0.6291666666666667	FALSE
caitlin	a	ratio decoy of 3	0.6892430278884463	FALSE
cali	a	ratio decoy of 3	0.8888888888888888	FALSE
callie	b	ratio decoy of 3	0.6120058565153733	TRUE
camila	a	ratio decoy of 3	0	FALSE
camille	a	ratio decoy of 3	1	FALSE
camryn	b	ratio decoy of 3	0.31970260223048325	FALSE
candice	b	ratio decoy of 3	0.6717948717948717	FALSE
candy	a	ratio decoy of 3	0.9440646364201367	FALSE
cara	a	ratio decoy of 3	0.327755905511811	FALSE
carina	a	ratio decoy of 3	0.9517730496453901	FALSE
carissa	b	ratio decoy of 3	0.4863849765258216	FALSE
carla	a	ratio decoy of 3	0.08532423208191127	FALSE
carlene	a	ratio decoy of 3	0.4241573033707865	FALSE
carmen	b	ratio decoy of 3	0.3752808988764045	FALSE
caroline	a	ratio decoy of 3	1	FALSE
carolyn	a	ratio decoy of 3	0.41675503711558853	FALSE
carrie	a	ratio decoy of 3	1	FALSE
casandra	b	ratio decoy of 3	0.9097345132743363	FALSE
catherine	b	ratio decoy of 3	0.514745308310992	FALSE
cathleen	b	ratio decoy of 3	0.15312916111850866	FALSE
cathy	a	ratio decoy of 3	0.6151368760064412	FALSE
cecelia	b	ratio decoy of 3	0.7521186440677966	FALSE
cecile	a	ratio decoy of 3	0.03413498836307215	FALSE
charity	b	ratio decoy of 3	0.6229971724787936	FALSE
charlie	a	ratio decoy of 3	0.6711758584807492	FALSE
chasity	a	ratio decoy of 3	1	FALSE
christa	b	ratio decoy of 3	0.7777777777777778	FALSE
chrystal	a	ratio decoy of 3	0.9069767441860465	FALSE
claire	b	ratio decoy of 3	0.5874060150375939	FALSE
clarice	b	ratio decoy of 3	0.6472663139329806	FALSE
clarissa	a	ratio decoy of 3	0.23583460949464014	FALSE
claudette	b	ratio decoy of 3	0.49032258064516127	FALSE
cleo	b	ratio decoy of 3	0.7897664071190211	FALSE
corina	a	ratio decoy of 3	0.7513761467889908	FALSE
corine	a	ratio decoy of 3	0.8860759493670886	FALSE
corinne	a	ratio decoy of 3	0.15151515151515152	FALSE
cornelia	a	ratio decoy of 3	0.7583102493074793	FALSE
cristol	b	ratio decoy of 3	0.7652694610778443	FALSE
cynthia	a	ratio decoy of 3	0.43330571665285833	FALSE
cadence	a	ratio binary	0.5311355311355311	FALSE
caitlin	a	ratio binary	0.8199737187910644	FALSE
cali	a	ratio binary	0.5575342465753425	FALSE
callie	b	ratio binary	0.9524103831891224	TRUE
camila	a	ratio binary	0.715509854327335	FALSE
camille	a	ratio binary	0.7650501672240803	FALSE
camryn	b	ratio binary	0.8118721461187215	FALSE
candice	b	ratio binary	0.3290529695024077	FALSE
candy	a	ratio binary	0.38103975535168194	FALSE
cara	a	ratio binary	0.5258883248730964	FALSE
carina	a	ratio binary	0.5184233076263924	FALSE
carissa	b	ratio binary	0.5709598031173093	FALSE
carla	a	ratio binary	0.4941569282136895	FALSE
carlene	a	ratio binary	0.5986277873070326	FALSE
carmen	b	ratio binary	0.5947467166979362	FALSE
caroline	a	ratio binary	0.4351145038167939	FALSE
carolyn	a	ratio binary	0.5607210626185958	FALSE
carrie	a	ratio binary	0.5316946959896507	FALSE
casandra	b	ratio binary	0.8991899189918992	FALSE
catherine	b	ratio binary	0.46259050683829445	FALSE
cathleen	b	ratio binary	0.8036935704514364	FALSE
cathy	a	ratio binary	0.8224617129892229	FALSE
cecelia	b	ratio binary	0.49047619047619045	FALSE
cecile	a	ratio binary	0.4625506072874494	FALSE
charity	b	ratio binary	0.526657060518732	FALSE
charlie	a	ratio binary	0.8197713517148622	FALSE
chasity	a	ratio binary	0.546594982078853	FALSE
christa	b	ratio binary	0.39293598233995586	FALSE
chrystal	a	ratio binary	0.333605220228385	FALSE
claire	b	ratio binary	0.6663993584603047	FALSE
clarice	b	ratio binary	0.3689892051030422	FALSE
clarissa	a	ratio binary	0.7323420074349443	FALSE
claudette	b	ratio binary	0.4827586206896552	FALSE
cleo	b	ratio binary	0.6769759450171822	FALSE
corina	a	ratio binary	0.7854113655640373	FALSE
corine	a	ratio binary	0.19913419913419914	FALSE
corinne	a	ratio binary	0.7560617193240264	FALSE
cornelia	a	ratio binary	0.3034267912772586	FALSE
cristol	b	ratio binary	0.8051496172581768	FALSE
cynthia	a	ratio binary	0.748939179632249	FALSE
